# Supplementary material for: Synthesis of anisotropic TiO2 hollow microspheres using cave particles as templates and application in water treatment
Source: Royal Society of Chemistry journal article supplement (doi:10.1039/c3nj01302b), 2014-01-01
Supplement: c3nj01302b1.pdf [file c3nj01302b1.pdf]

## Synthesis of Anisotropic TiO<sub>2</sub> Hollow Microspheres Using Cave Particles as Templates and Application in Water Treatment

Hailin Cong, Yuezhong Wang, Bing Yu, Jilei Wang, and Mingming Jiao

### Electronic Supplementary Information (ESI) for New Journal of Chemistry

The reaction mechanism of iodine and butylacrylate under photocatalysis of TiO<sub>2</sub> hollow spheres (ESI,† Fig. S1) and the corresponding references:

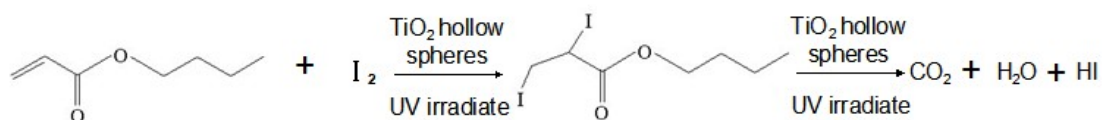

**Fig. S1.** Reaction mechanism of iodine and butylacrylate under photocatalysis of TiO<sub>2</sub> hollow spheres.<sup>1-9</sup>

Corresponding references

- 1 R. M. Noyes, R. G. Dickinson and V. J. Schomaker, *J. Am. Chem. Soc.*, 1945, **67**, 1319.
- 2 V. L. Heasley, D. F. Shellhamer and L. E. Heasley, *J. Org. Chem.*, 1980, **45**, 4649.
- 3 J. X. Duan, W. R. Dolbier and Q. Y. Chen, *J. Org. Chem.*, 1998, **63**, 9486.
- 4 J. S. Yadav, B. V. S. Reddy and A. P. Singh, *Tetrahedron Letters*, 2008, **49**, 6880.
- 5 X. H. Gu and M. B. Sponsler, *Tetrahedron Letters*, 1996, **37**, 1571.
- 6 R. A. Hollins and M. P. A. Campos, *J. Org. Chem.*, 1979, **44**, 3931.
- 7 T. L. Yao, D. W. Yue and R. C. Larock, *J. Org. Chem.*, 2005, **70**, 9985.
- 8 D. W. Yue, T. L. Yao and R. C. Larock, *J. Org. Chem.*, 2005, **70**, 10292.
- 9 S. Arimitsu, J. M. Jacobsen and G. B. Hammond, *J. Org. Chem.*, 2008, **73**, 2886.
